# Supplementary material for: Improved Antibody‐Specific Epitope Prediction Using AlphaFold and AbAdapt
Source: PubMed Central journal article supplement — Chembiochem. 2022 Aug 11;23(18):e202200303. doi: 10.1002/cbic.202200303 (PMC9543094; doi:10.1002/cbic.202200303), 2022-08-11
Supplement: CBIC-23-0-s001.pdf [file CBIC-23-0-s001.pdf]

# ChemBioChem

Supporting Information

## **Improved Antibody-Specific Epitope Prediction Using AlphaFold and AbAdapt\*\***

Zichang Xu, Ana Davila, Jan Wilamowski, Shunsuke Teraguchi, and Daron M. Standley\*

**The RMSD of CDRs and paratope in the LOOCV set**

|                       |        | CDR-H1 | CDR-H2 | CDR-H3 | CDR-L1 | CDR-L2 | CDR-L3 | Paratope |
|-----------------------|--------|--------|--------|--------|--------|--------|--------|----------|
| AlphaFold2            | Median | 0.61   | 0.64   | 2.88   | 0.59   | 0.49   | 0.78   | 1.76     |
|                       | Mean   | 0.93   | 0.89   | 3.44   | 0.84   | 0.64   | 1.15   | 2.08     |
|                       | Stdev  | 0.89   | 0.98   | 2.42   | 0.90   | 0.82   | 1.08   | 1.28     |
| Repertoire<br>Builder | Median | 0.81   | 0.81   | 4.01   | 0.67   | 0.57   | 0.92   | 2.44     |
|                       | Mean   | 1.14   | 1.07   | 4.38   | 0.95   | 0.72   | 1.37   | 2.69     |
|                       | Stdev  | 0.97   | 1.03   | 2.31   | 0.90   | 0.79   | 1.24   | 1.20     |

**The RMSD of CDRs and paratope in the holdout set**

|                       |        | CDR-H1 | CDR-H2 | CDR-H3 | CDR-L1 | CDR-L2 | CDR-L3 | Paratope |
|-----------------------|--------|--------|--------|--------|--------|--------|--------|----------|
| AlphaFold2            | Median | 0.67   | 0.74   | 2.86   | 0.62   | 0.55   | 0.25   | 1.80     |
|                       | Mean   | 1.14   | 1.04   | 3.62   | 0.88   | 0.60   | 1.31   | 2.12     |
|                       | Stdev  | 1.06   | 0.86   | 2.88   | 1.01   | 0.41   | 1.17   | 1.17     |
| Repertoire<br>Builder | Median | 0.85   | 1.07   | 4.07   | 0.72   | 0.61   | 0.28   | 2.59     |
|                       | Mean   | 1.34   | 1.31   | 4.44   | 1.05   | 0.74   | 1.53   | 2.83     |
|                       | Stdev  | 1.12   | 1.01   | 2.19   | 1.09   | 0.79   | 1.15   | 1.18     |

**Supplementary Table 1. The RMSD (Å) of CDRs and paratope in the LOOCV and holdout set.**

**Initial epitope prediction of LOOCV set**

|                    | Prediction     | Median | Mean  | Stdev |
|--------------------|----------------|--------|-------|-------|
|                    | TRAIN ROC AUC  | 0.863  | 0.854 | 0.048 |
|                    | TEST ROC AUC   | 0.694  | 0.687 | 0.147 |
| AbAdapt/AbAdapt-AF | TEST PR AUC    | 0.165  | 0.200 | 0.137 |
|                    | TEST Recall    | 0.625  | 0.599 | 0.241 |
|                    | TEST Precision | 0.149  | 0.157 | 0.088 |

**Initial epitope prediction of holdout set**

|                    | Prediction     | Median | Mean  | Stdev |
|--------------------|----------------|--------|-------|-------|
|                    | TEST ROC AUC   | 0.695  | 0.690 | 0.146 |
| AbAdapt/AbAdapt-AF | TEST PR AUC    | 0.162  | 0.212 | 0.159 |
|                    | TEST Recall    | 0.571  | 0.593 | 0.224 |
|                    | TEST Precision | 0.150  | 0.159 | 0.092 |

**Supplementary Table 2. The initial epitope prediction of AbAdapt and AbAdapt-AF in LOOCV and holdout set.**

|                                   | Prediction       | Median | Mean  | Stdev |
|-----------------------------------|------------------|--------|-------|-------|
| AbAdapt                           | TEST ROC AUC     | 0.721  | 0.705 | 0.152 |
|                                   | TEST PR AUC      | 0.189  | 0.226 | 0.151 |
|                                   | TEST Sensitivity | 0.684  | 0.621 | 0.246 |
|                                   | TEST Precision   | 0.155  | 0.159 | 0.084 |
| AbAdapt-AF                        | TEST ROC AUC     | 0.756  | 0.727 | 0.172 |
|                                   | TEST PR AUC      | 0.204  | 0.276 | 0.214 |
|                                   | TEST Sensitivity | 0.775  | 0.708 | 0.250 |
|                                   | TEST Precision   | 0.162  | 0.161 | 0.090 |
| AbAdapt-AF<br>(AF's Ab/Ag models) | TEST ROC AUC     | 0.745  | 0.715 | 0.168 |
|                                   | TEST PR AUC      | 0.195  | 0.259 | 0.206 |
|                                   | TEST Sensitivity | 0.771  | 0.691 | 0.258 |
|                                   | TEST Precision   | 0.158  | 0.160 | 0.096 |

**Supplementary Table 3. Comparison of the performance of antibody-specific epitope prediction between AbAdapt and AbAdapt-AF.** Analysis of the antibody-specific epitope prediction performance of the AbAdapt-AF pipeline that was trained by antigen models from Spanner and antibody models from AlphaFold2 versus using antibody and antigen models both from AlphaFold2 as input.

**The RMSD of CDR-H3 and paratope in the LOOCV set**

|          |        | Rank 1 | Rank 2 | Rank 3 | Rank 4 | Rank 5 |
|----------|--------|--------|--------|--------|--------|--------|
| CDR-H3   | Median | 2.88   | 2.90   | 2.95   | 2.90   | 3.18   |
|          | Mean   | 3.44   | 3.45   | 3.51   | 3.53   | 3.69   |
|          | Stdev  | 2.42   | 2.42   | 2.38   | 2.42   | 2.49   |
| Paratope | Median | 1.76   | 1.78   | 1.86   | 1.83   | 1.96   |
|          | Mean   | 2.08   | 2.10   | 2.12   | 2.15   | 2.21   |
|          | Stdev  | 1.28   | 1.27   | 1.31   | 1.29   | 1.29   |

**The RMSD of CDR-H3 and paratope in the holdout set**

|          |        | Rank 1 | Rank 2 | Rank 3 | Rank 4 | Rank 5 |
|----------|--------|--------|--------|--------|--------|--------|
| CDR-H3   | Median | 2.86   | 3.04   | 2.95   | 3.04   | 3.41   |
|          | Mean   | 3.62   | 3.74   | 3.80   | 3.83   | 3.86   |
|          | Stdev  | 2.88   | 2.84   | 2.89   | 2.82   | 2.80   |
| Paratope | Median | 1.80   | 1.97   | 1.91   | 1.84   | 1.98   |
|          | Mean   | 2.12   | 2.17   | 2.20   | 2.23   | 2.28   |
|          | Stdev  | 1.17   | 1.15   | 1.19   | 1.26   | 1.30   |

**Supplementary Table 4. Comparison of the quality of top 5 antibody models by AlphaFold2.**

| <b>Name</b>                          | <b>Description</b>                                                                                                                                                                                     |
|--------------------------------------|--------------------------------------------------------------------------------------------------------------------------------------------------------------------------------------------------------|
| <b>Initial_Paratope</b>              | DNN binary classifier to predict paratope (1) or not (0) based on Antibody sequence and structure                                                                                                      |
| <b>Initial_Epitope</b>               | DNN binary classifier to predict epitope (1) or not (0) based on Antigen sequence and structure                                                                                                        |
| <b>Piper_Docking and Hex_Docking</b> | Boosted Tree binary classifier to predict of a pose is True (1) or not (0) based on pose sequence and structure                                                                                        |
| <b>Piper_Hex_Docking</b>             | Boosted Tree regressor to predict IRMSD <sup>-2</sup> , based on AbAdapt docking Score, the number of clashes, Hex or Piper docking energy, the fraction of Piper poses in a cluster, and cluster size |
| <b>Final_Epitope</b>                 | DNN binary classifier to predict epitope (1) or not (0) based on Antigen sequence and structure as well as docking contact statistics                                                                  |

**Supplementary Table 5. Description of machine learning models in AbAdapt and AbAdapt-AF pipelines.**

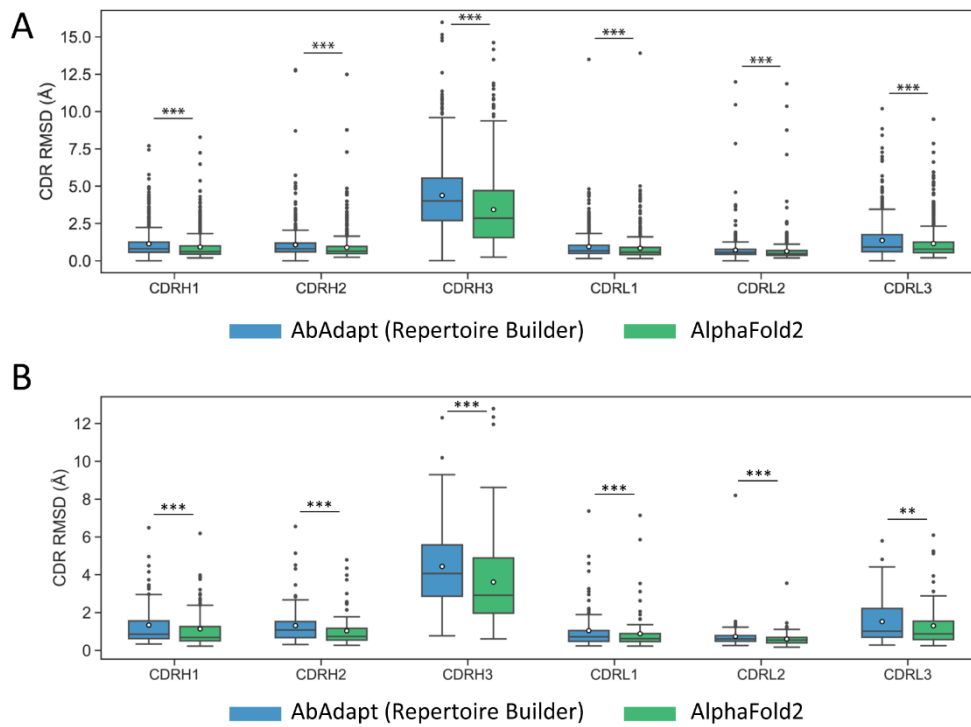

**Supplementary Figure 1. Comparison of the modeling performance of antibodies between AbAdapt and AlphaFold2.** The RMSD of six CDRs of antibody model in LOOCV training set with 620 queries (A) and Holdout set with 100 queries (B) by AbAdapt powered by Repertoire Builder (blue) or AlphaFold2 (green). The Wilcoxon matched-pairs signed rank test was performed to compare the corresponding performance between AbAdapt and AbAdapt-AF (\*\* $P \leq 0.01$ ; \*\*\* $P \leq 0.001$ ). The empty circle in each box indicated the average value.

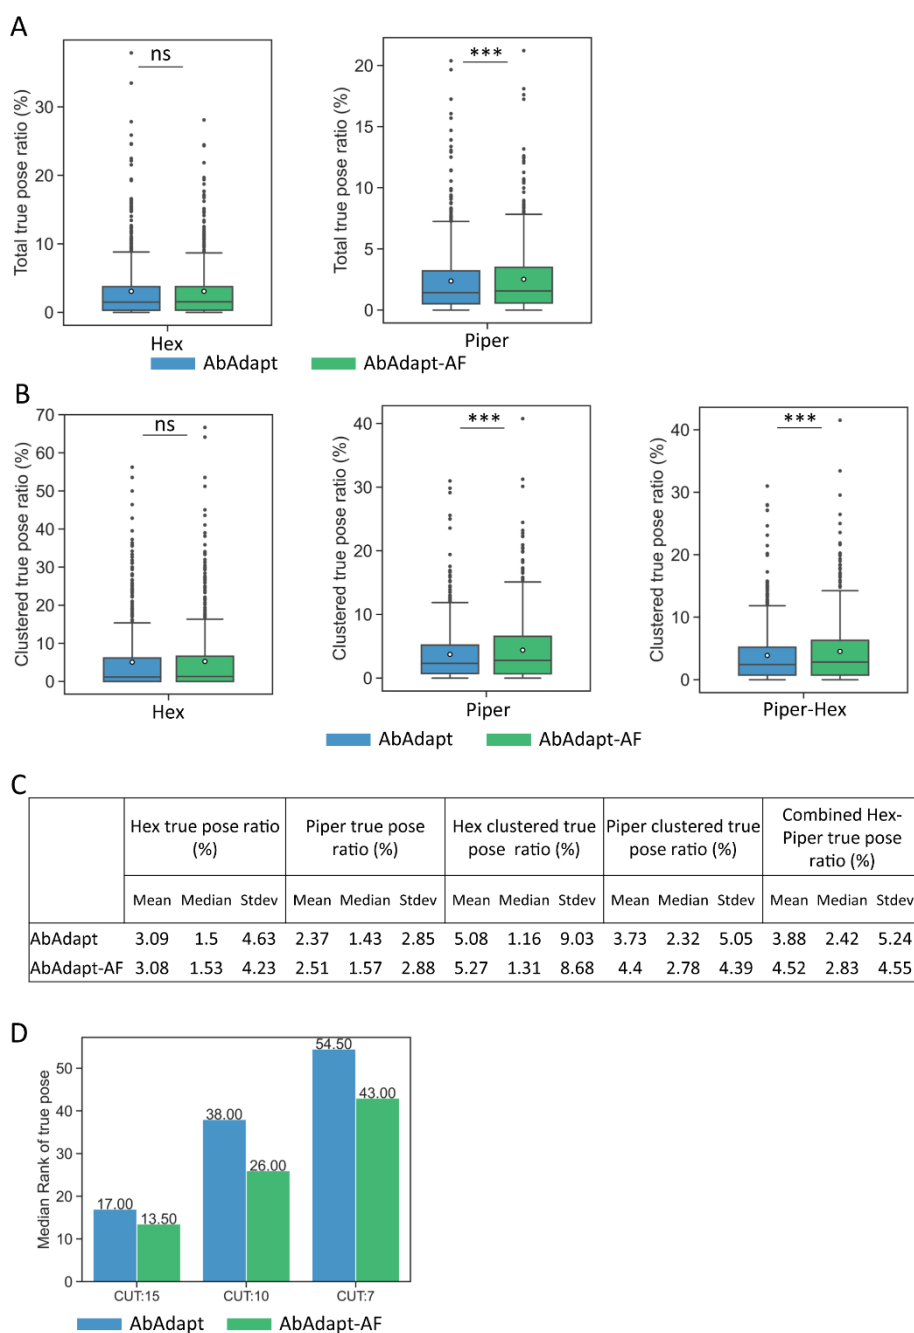

**Supplementary Figure 2. Comparison of docking performance and pose combination between AbAdapt and AbAdapt-AF in LOOCV set.** (A) The total true pose that produced by Hex (left) and Piper (right) by AbAdapt and AbAdapt-AF. (B) The true pose ratio after clustering the pose from Hex (left) and Piper (middle) separately and a combination of them (right). The Wilcoxon matched-pairs signed rank test was performed to compute the significance (\*\*\*)  $P \leq 0.001$ , ns: not significant). (C) The average and median values of each true pose ratio that related to (A) and (B). (D) The median rank of true poses after the combination of Hex-Piper clusters for the sharing of successful queries among AbAdapt and AbAdapt-AF. The true pose was defined by the cutoff value indicated on the x-axis (15, 10, or 7 Å) for the RMSD of the interface residues (IRMSD) with minimum epitope and paratope accuracies of 50%.



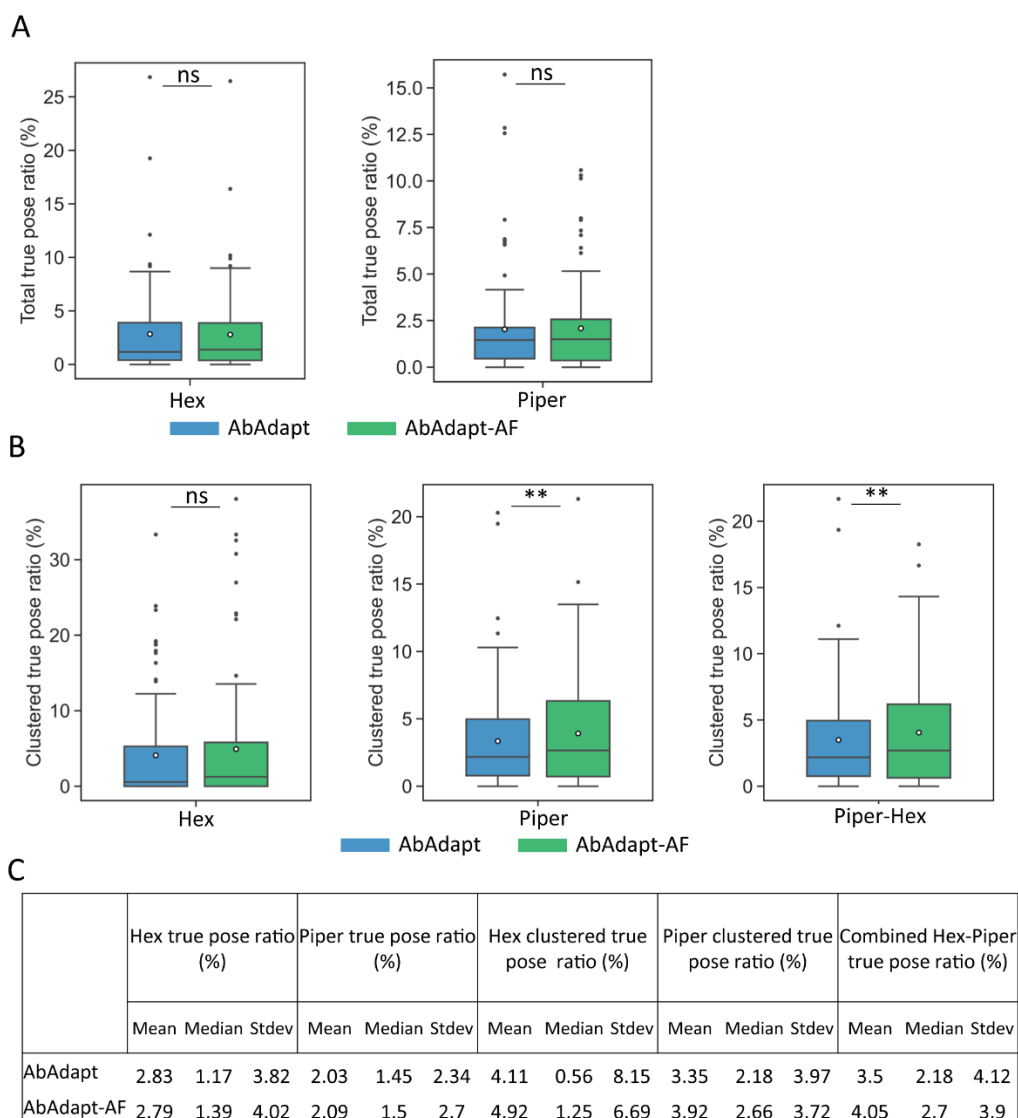

**Supplementary Figure 3. Comparison of docking performance and pose combination between AbAdapt and AbAdapt-AF in holdout set.** (A) The total true pose that produced by Hex (left) and Piper (right) by AbAdapt and AbAdapt-AF. (B) The true pose ratio after clustering the pose from Hex (left) and Piper (middle) separately and a combination of them (right). The Wilcoxon matched-pairs signed rank test was performed to compute the significance (\*\* $P \leq 0.01$ , ns: not significant). (C) The average and median values of each true pose ratio that related to (A) and (B).

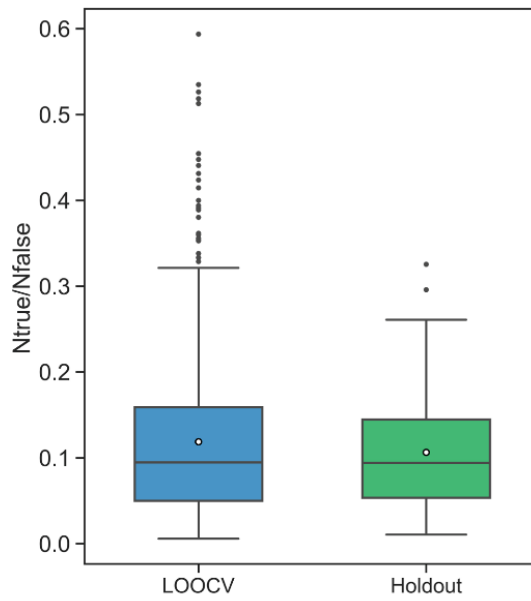

**Supplementary Figure 4. PR ROC baseline of LOOCV and holdout sets.** The baseline is based on the ratio of epitope and non-epitope amino acid residue. The “Ntrue” indicate the number of epitope residue and “Nfalse” indicate the number of non-epitope residue in each antigen from the LOOCV set (blue) and the holdout set (green).

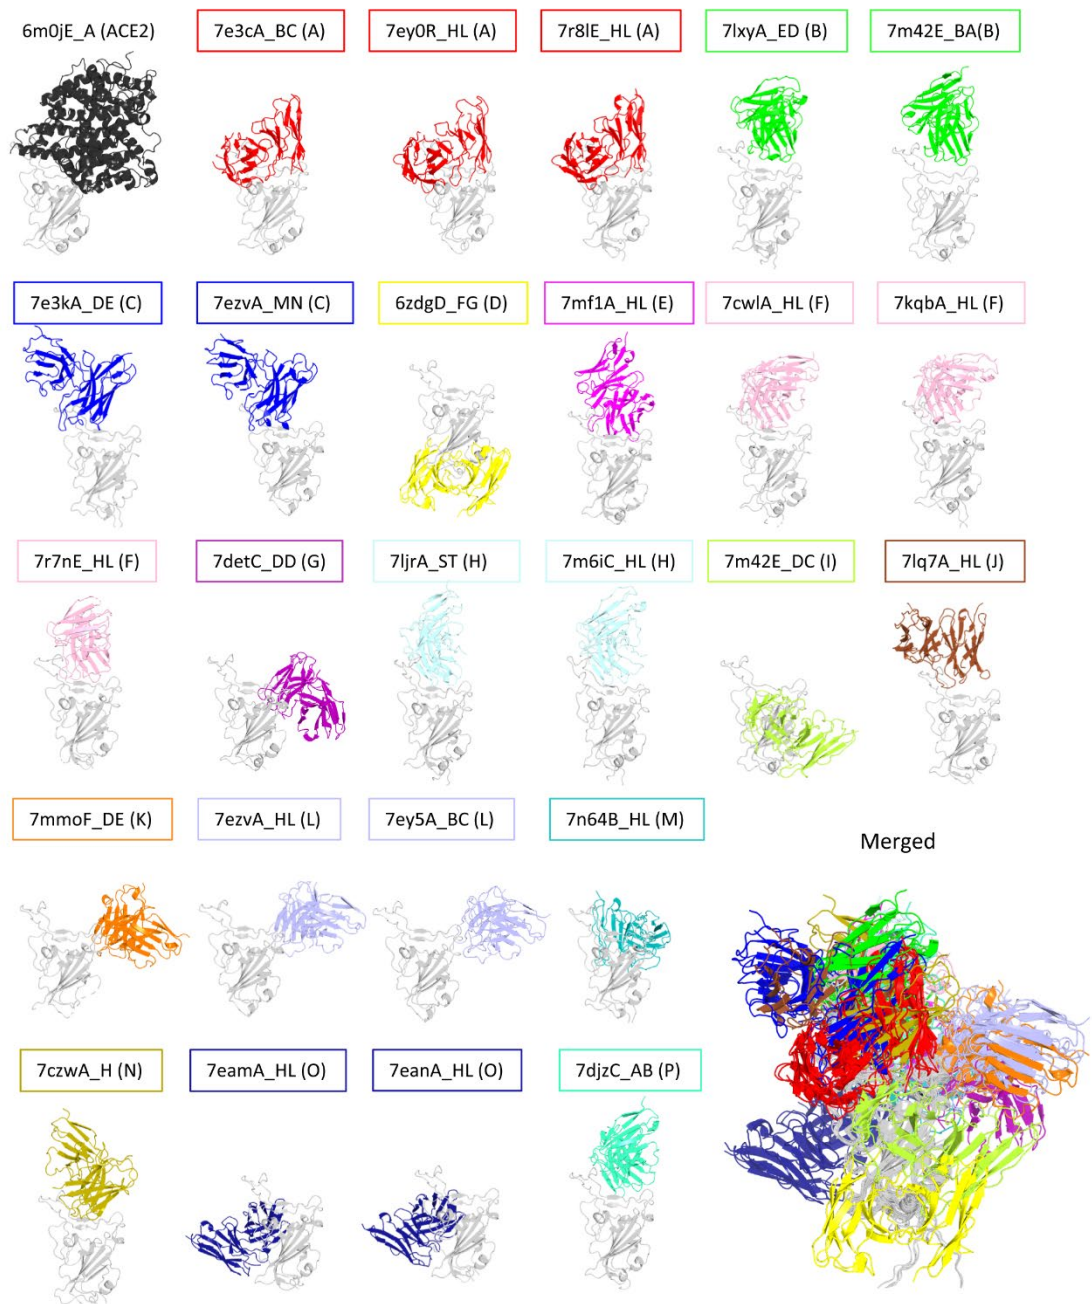

**Supplementary Figure 5. The visualization of 25 SARS-Cov-2 RBD-antibody complexes.** The epitope cluster is given followed by the query name. Each RBD in the complex was aligned as the orientation of the RBD in RBD-ACE2 binding pose.
